# Supplementary material for: Electrochemo-dynamical characterization of polypyrrole actuators coated on gold electrodes
Source: Royal Society of Chemistry journal article supplement (doi:10.1039/c5cp05841d), 2015-11-18
Supplement: c5cp05841d1.pdf [file c5cp05841d1.pdf]

## Electrochemo-dynamical characterization of polypyrrole actuators coated on gold.

Received 00th January 20xx,  
Accepted 00th January 20xx

J. G. Martinez,<sup>a</sup> T. F. Otero<sup>a</sup> and E. W. H. Jager<sup>b</sup>

DOI: 10.1039/x0xx00000x

www.rsc.org/

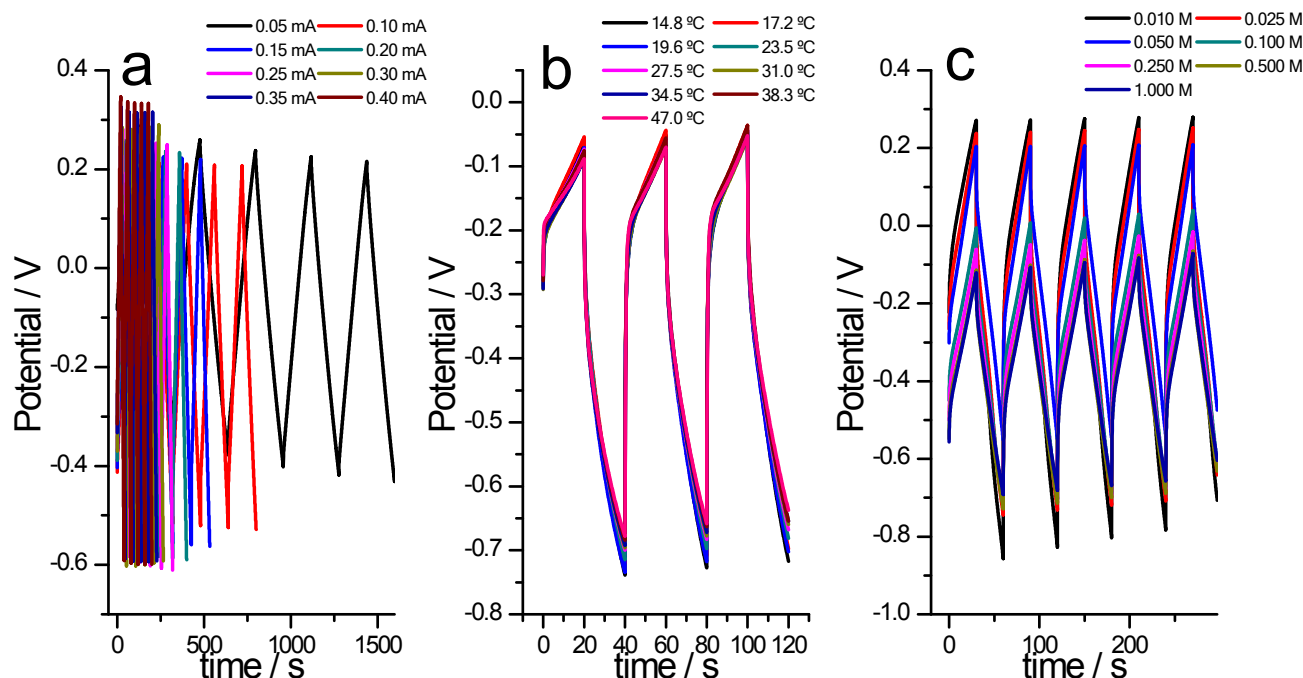

Figure S1: (a) Overlapped Chronopotentiometric responses obtained from a PPy gold coated wire in 0.1 M LiClO<sub>4</sub> aqueous solution applying different constant anodic currents, indicated in the figure, at room temperature (21 °C). (b) Chronopotentiograms obtained from a PPy Au coated wire in 0.1 M LiClO<sub>4</sub> aqueous solution applying 0.5 mA as anodic current at different temperatures, indicated in the figure. (c) Chronopotentiograms obtained from a PPy coated gold wire in different LiClO<sub>4</sub> aqueous solutions having different concentrations, indicated in the figure, when a constant anodic current of 0.2 mA was applied during 30 s at room temperature (21 °C). Figures 1, 2, and 3 were obtained from those results normalized to the same original potentials.

<sup>a</sup> Universidad Politécnica de Cartagena. ETSII. Center for Electrochemistry and Intelligent Materials (CEMI). Paseo Alfonso XIII, 30203 Cartagena. Spain.

<sup>b</sup> Linköping University, Department of Physics, Chemistry and Biology, Biosensors and Bioelectronics Centre, 58183 Linköping, Sweden.
